1 **A Novel Role for the Nuclear Receptor, NR4A1, in *Klebsiella pneumoniae* Lung Infection**

2

3 Jessica Partyka<sup>a,b</sup>, Matthew Henkel<sup>a,b</sup>, Brian T. Campfield<sup>a,b,c#</sup>

4

5 <sup>a</sup>Division of Pediatric Infectious Diseases, Department of Pediatrics, University of Pittsburgh

6 School of Medicine, Pittsburgh, PA

7 <sup>b</sup>UPMC Children's Hospital of Pittsburgh, Pittsburgh, PA

8 <sup>c</sup>Richard K. Mellon Institute for Pediatric Research, Department of Pediatrics, University of

9 Pittsburgh School of Medicine, Pittsburgh, PA

10

11 Running Head: NR4A1 in *K. pneumoniae* Lung Infection

12

13 #Address correspondence to:

14 Brian T. Campfield, M.D.

15 4401 Penn Ave.

16 8125 Rangos Research Building

17 Pittsburgh, PA 15224

18 [brian.campfield@chp.edu](mailto:brian.campfield@chp.edu)

19

20

21 **KEYWORDS**

22 pneumonia, *K. pneumoniae*, NR4A1, Nur77, neutrophils

23

## NR4A1 in *K. pneumoniae* Lung Infection

### 24 **ABSTRACT**

25 *Klebsiella pneumoniae* is a Gram-negative bacterial pathogen and common cause of pneumonia  
26 and bacteremia. Increasingly, *K. pneumoniae* has become a public health concern due to its rate  
27 of nosocomial infection and emerging, broad-spectrum antibiotic resistance. The nuclear  
28 receptor NR4A1 exhibits functionality in a multitude of organ systems and is implicated as  
29 having a role in the immune response to bacterial infection, though its role in *K. pneumoniae*  
30 infection is unknown. To determine if *Nr4a1* functions in response to *K. pneumoniae* pulmonary  
31 disease, we infected wild-type and *Nr4a1*<sup>-/-</sup> mice with *K. pneumoniae* and assessed bacterial  
32 growth, immune cell recruitment and function, and cytokine production. We found that *Nr4a1*<sup>-/-</sup>  
33 mice had increased bacterial burden in the lungs and spleen, though no differences in cell  
34 recruitment. Pro-inflammatory cytokines, *Il1β* and *Il6*, as well as chemokine, *Cxcl2*, were  
35 significantly decreased in the BAL fluid cells of *Nr4a1*<sup>-/-</sup> mice 5 hours post-infection.  
36 Additionally, *Nr4a1*<sup>-/-</sup> mice had reduced IL-1β and myeloperoxidase protein production. We  
37 then examined the bactericidal function of macrophages and neutrophils from WT and *Nr4a1*<sup>-/-</sup>  
38 mice. We identified that *Nr4a1*<sup>-/-</sup> neutrophils had decreased bactericidal function compared to  
39 wild-type neutrophils, which was associated with reduced expression of *Il1β*, *Lcn2*, *Mpo*, and  
40 *Lyz2*. These data suggest *Nr4a1* plays a novel and essential role in neutrophil function during  
41 the host immune response to *K. pneumoniae* pulmonary infection.

42

### 43 **INTRODUCTION**

44 *Klebsiella pneumoniae* is a Gram-negative bacterium of the *Enterobacteriaceae* family.  
45 Recognized as an intestinal commensal in healthy individuals, *K. pneumoniae* is a common  
46 cause of disease in immunocompromised patients and is the third most common healthcare

## NR4A1 in *K. pneumoniae* Lung Infection

47 associated infection, manifesting as urinary tract infections, bacteremia, and pneumonia (1). In  
48 addition, *K. pneumoniae* strains are becoming increasingly resistant to antibiotic treatments,  
49 including carbapenems and extended-spectrum  $\beta$ -lactams (ESBL); thus, *K. pneumoniae*  
50 constitutes a public health threat for which new treatment modalities are urgently needed (2, 3).

51

52 The orphan nuclear receptor subfamily 4 group A member 1 (NR4A1) is a steroid-thyroid  
53 receptor and intracellular transcription factor encoded by the *Nr4a1* gene, also known as Nur77.  
54 NR4A1 is a molecule with diverse biologic functions, including regulation of inflammation in  
55 the central nervous system, heart, and lung (4–11). Specifically, NR4A1 is a factor in  
56 macrophage development and inflammatory response through polarization and transcriptional  
57 regulation (12–16). Within macrophages, NR4A1 exhibits a direct effect on the NF- $\kappa$ B pathway  
58 by directly blocking p65 from binding to the  $\kappa$ B element, and prior work has shown deletion of  
59 the *Nr4a1* gene increases p65 phosphorylation, thus activating NF- $\kappa$ B mediated transcription, in  
60 macrophages (17, 18).

61

62 Due to its varied impact in immunological pathways, the role of NR4A1 in bacterial infection  
63 has been explored but remains poorly understood. In *Escherichia coli* induced peritonitis,  
64 NR4A1 has a limited role in the clearance of the bacteria (19). However, Hamers *et al.* later  
65 showed the deletion of the *Nr4a1* gene aggravated *E. coli* induced peritonitis due to pro-  
66 inflammatory macrophage polarization (20). In addition to showing NR4A1 directly interacts  
67 with the NF- $\kappa$ B pathway, Li *et al.* also showed NR4A1 is a vital protein for inflammation  
68 reduction and, ultimately, survival in a sepsis model (17). The sole study of NR4A1 in bacterial  
69 lung infection examined *E. coli*, an uncommon cause of pneumonia, and showed that *Nr4a1* was

## NR4A1 in *K. pneumoniae* Lung Infection

70 rapidly induced during infection, and that *Nr4a1*<sup>-/-</sup> mice had decreased bacterial burden *in vivo*,  
71 though the mechanisms underlying these observations remain unclear (21).

72

73 The current study examined the role of NR4A1 in *K. pneumoniae* pneumonia. Here, we found  
74 that *Nr4a1* deficiency led to an increase of *K. pneumoniae* bacterial lung burden and  
75 dissemination. Mechanistically, phagocyte recruitment was unaffected, though inflammatory  
76 cytokine/chemokine production was decreased in *Nr4a1*<sup>-/-</sup> mice, identifying that *Nr4a1*<sup>-/-</sup>  
77 neutrophils had defective bactericidal function and attenuated inflammatory gene expression,  
78 suggesting that *Nr4a1* is a novel, critical mediator of neutrophil function.

79

## 80 RESULTS

### 81 ***Nr4a1*<sup>-/-</sup> mice are more susceptible to *Klebsiella pneumoniae* pulmonary infection**

82 To explore the impact of *Nr4a1* on control of *K. pneumoniae* pulmonary infection, WT and  
83 *Nr4a1*<sup>-/-</sup> mice had bacterial burden determined by colony-forming units (CFU) at 24 and 48  
84 hours after infection in the lung, as a measure of local control, and in the spleen as a measure of  
85 bacterial dissemination. Compared to WT mice, *Nr4a1*<sup>-/-</sup> mice had significantly increased *K.*  
86 *pneumoniae* lung burden and spleen burden 48 hours post-infection (Fig. 1c-d). These  
87 differences were not present at 24 hours post-infection (Fig. 1a-b). These data identify that  
88 *Nr4a1*<sup>-/-</sup> mice controlled *K. pneumoniae* acute lung infection poorly, suggesting that *Nr4a1* may  
89 play an important role in the immune response to acute *K. pneumoniae* lung infection.

90

### 91 ***Nr4a1*<sup>-/-</sup> mice have reduced pro-inflammatory cytokine production in BAL fluid cells and** 92 **whole lung early following *K. pneumoniae* lung infection**

## NR4A1 in *K. pneumoniae* Lung Infection

93 Next, to determine if immediate phagocyte function was impaired in the absence of *Nr4a1*, we  
94 analyzed cytokine/chemokine gene expression and protein production in the bronchoalveolar  
95 lavage fluid (BALF) and lung from WT and *Nr4a1*<sup>-/-</sup> mice 5 hours post *K. pneumoniae*  
96 pulmonary infection. Pro-inflammatory cytokines, *Il1β* and *Il6*, and the neutrophil chemokine,  
97 *Cxcl2*, were significantly decreased in the BALF of *Nr4a1*<sup>-/-</sup> mice (Fig. 2a, b, e). However, *Tnfa*  
98 and the chemokines *Cxcl1* and *Cxcl5* were not different (Fig. 2c, d, f), suggesting the NR4A1-  
99 dependent gene regulation was reflective of a specific cell population or pathway mediating the  
100 phenotype and this was observable within 5 hours post-infection.

101

102 Whole lung protein from WT and *Nr4a1*<sup>-/-</sup> mice was also assessed at 5 hours and 24 hours post  
103 *K. pneumoniae* infection. Consistent with early gene expression, IL-1β protein was significantly  
104 reduced in *Nr4a1*<sup>-/-</sup> compared to WT (Fig. 3a) at 5 hours post-infection. This reduction in IL-1β  
105 protein was sustained through 24 hours post-infection (Fig. 3c). We then sought to determine  
106 whether the *Nr4a1*-dependent phenotype was associated with reduced production of the effector  
107 molecule myeloperoxidase (MPO), an enzyme critical for phagocyte-mediated bacterial killing  
108 of *K. pneumoniae* (22). In the *Nr4a1*<sup>-/-</sup> strain, MPO production trended down within 5 hours  
109 post-infection ( $P = 0.0689$ ) (Fig. 3b). By the 24 hours post-infection timepoint, *Nr4a1*<sup>-/-</sup> mice  
110 had significantly decreased MPO protein in the lungs compared to WT mice (Fig. 3d). These  
111 data suggest that early immune gene transcription reflects protein production during *K.*  
112 *pneumoniae* lung infection, and that *Nr4a1*-deficient susceptibility to infection is associated with  
113 reduced production of phagocyte markers.

114

## NR4A1 in *K. pneumoniae* Lung Infection

### 115 ***Nr4a1*<sup>-/-</sup> and WT mice have similar immune cell abundance and cytokine gene expression** 116 **24 hours following *K. pneumoniae* lung infection**

117 To examine a potential mechanism by which *Nr4a1* protects against lung infection, we  
118 performed flow cytometry on the lungs of WT and *Nr4a1*<sup>-/-</sup> mice at 24 hours post *K. pneumoniae*  
119 infection, prior to differences in bacterial burden, to determine if *Nr4a1* deletion resulted in a  
120 change in immune cell recruitment. No significant differences were observed in inflammatory  
121 macrophages (CD45<sup>+</sup>/CD11b<sup>+</sup>/CD11c<sup>+</sup>), alveolar macrophages (CD45<sup>+</sup>/CD11c<sup>+</sup>/SiglecF<sup>+</sup>), or  
122 neutrophils (CD45<sup>+</sup>/CD11b<sup>+</sup>/Ly6G<sup>+</sup>) (Fig. S1b-d). Interestingly, no differences in transcript  
123 were found between pro-inflammatory cytokines *Il1β*, *Tnfa*, or *Il6*, or the neutrophil-specific  
124 gene *Lcn2* (Fig. S2a-d). These data suggest the role *Nr4a1* plays in the immune response to *K.*  
125 *pneumoniae* acute lung infection is not due to cell recruitment and is not reflected in gene  
126 transcription through 24 hours post-infection.

127

### 128 ***Nr4a1*<sup>-/-</sup> macrophage and neutrophil bactericidal function *in vitro***

129 Bone marrow macrophage bacteria killing assays were analyzed to determine bacterial growth as  
130 a measure of *in vitro* bactericidal function from WT and *Nr4a1*<sup>-/-</sup> mice. No differences in  
131 bacterial growth were observed between the two strains at 30 minutes or 60 minutes co-culture  
132 with *K. pneumoniae* (Fig. S4a), identifying that macrophages of both genotypes have similar  
133 bactericidal function. Similarly, the gene transcript levels for *Il1β*, *Il6*, and *Cxcl2* were not  
134 different, suggesting that the differences seen in the BALF cells and lung homogenate *in vivo*  
135 does not likely reflect *Nr4a1*-mediated function in macrophages (Fig. S4b-d).

136

## NR4A1 in *K. pneumoniae* Lung Infection

137 Neutrophil bacteria killing assays were similarly analyzed to determine bacterial growth as a  
138 measure of *in vitro* bactericidal function from WT and *Nr4a1*<sup>-/-</sup> mice. Notably, in WT  
139 neutrophils co-cultured with *K. pneumoniae*, *Nr4a1* gene transcription is induced compared to  
140 naïve WT neutrophils (Fig. 4a). Supernatants from *Nr4a1*<sup>-/-</sup> neutrophils had significantly higher  
141 *K. pneumoniae* growth compared to WT neutrophils within 60 minutes, though at 30 minutes no  
142 differences were observed between genotypes (Fig. 4b-c). These data suggest that *Nr4a1*<sup>-/-</sup>  
143 neutrophils *K. pneumoniae* killing is time dependent. Taken together, these data suggest *Nr4a1*  
144 transcription is induced in neutrophils by *K. pneumoniae* infection and is critical for the  
145 bactericidal activity.

146

### 147 ***Nr4a1*<sup>-/-</sup> neutrophils have decreased cytokine transcript compared to WT neutrophils**

148 To assess *Nr4a1*-dependent transcriptional changes in neutrophils, *Nr4a1*<sup>-/-</sup> neutrophil RNA was  
149 isolated 30 minutes after *K. pneumoniae* co-culture (when the bacterial burdens are equivalent).  
150 Here, *Nr4a1*<sup>-/-</sup> neutrophils had decreased *Il1β* transcript compared to WT neutrophils, as was  
151 seen in BALF cells 5 hours post-infection (Fig. 5a). *Nr4a1*<sup>-/-</sup> neutrophils also had significantly  
152 decreased expression of neutrophil antibacterial transcripts *Lcn2*, *Mpo*, and *Lyz2* (Fig. 5b, c, d),  
153 further suggesting an important role for *Nr4a1* in neutrophil response to *K. pneumoniae*  
154 infection.

155

## 156 **DISCUSSION**

157 Due to its nosocomial infection rate and developing antibiotic resistance, *Klebsiella pneumoniae*  
158 is a growing public health concern (1–3). Developing new approaches to treat *K. pneumoniae*  
159 and other antibiotic resistant infections is an increasingly urgent task. One of the methods

## NR4A1 in *K. pneumoniae* Lung Infection

160 through which this may be done is targeting the host immune response to stimulate better  
161 clearance of bacterial burden from the infection site. This can be done by targeting different  
162 immune cells, including T-cells, macrophages, and neutrophils, to enhance response to infection  
163 (23–25). For macrophages and neutrophils, this can be done by augmenting phagocytosis of  
164 bacteria (24–27). However, modulating host immunity is an understudied approach for the  
165 treatment of bacterial infection. More study of host immune responses and host-pathogen  
166 interaction in bacterial infection, including *K. pneumoniae*, is required if harnessing host  
167 immunity as a potential treatment is to be successful.

168  
169 The orphan nuclear receptor NR4A1 is expressed in many immune cells, such as T-cells and  
170 myeloid cells. NR4A1 is necessary for proper T-cell function and development (28, 29). It has  
171 likewise been shown to be important for the development and function of several subsets of  
172 macrophages, and as an important regulator of macrophage polarization (12–16). Little is known  
173 about the role of NR4A1 in neutrophils, though human and murine neutrophils express all three  
174 of the transcripts for Nur nuclear receptors, *Nr4a1/Nur77*, *Nr4a2/Nurr1*, and *Nr4a3/Nor1*, in  
175 response to inflammatory stimuli (30, 31). Highly expressed in numerous immune cell types, we  
176 sought to identify cellular mechanisms for NR4A1 in order to elucidate its potential as a target  
177 for immunomodulatory therapies.

178  
179 The current study aimed to determine the role of NR4A1 in *K. pneumoniae* pulmonary infection.  
180 Prior studies have described a limited or detrimental role for NR4A1 in bacterial infections (19,  
181 21). To date, the only study of bacterial lung infection employed an *E. coli* model, in which  
182 *Nr4a1*<sup>-/-</sup> mice had improved bacterial clearance and survival (21). However, the clinical



## NR4A1 in *K. pneumoniae* Lung Infection

183 relevance is limited, as *E. coli* is not a cause of community or hospital acquired pneumonia, and  
184 little mechanistic information was ascertained from this work. Conversely, our study determined  
185 that *Nr4a1* loss was detrimental in the *K. pneumoniae* pneumonia model. Mechanistically, the  
186 observation that NR4A1 deficiency did not impair macrophage or neutrophil cell recruitment to  
187 the lung suggested that NR4A1 may be important for innate antibacterial cell-intrinsic function.  
188 While some genes were unchanged, reduced lung expression of the innate pro-inflammatory  
189 cytokines, *Il1 $\beta$*  and *Il6*, as well as the neutrophil recruitment chemokine, *Cxcl2*, 5 hours after  
190 infection suggested an innate phagocyte response pathway defect (32). Several disease models  
191 have shown that macrophage or monocyte expression of NR4A1 has significant impact on  
192 inflammation in models of cardiovascular disease, LPS-induced sepsis, and fibrosis (6, 7, 17, 18,  
193 33, 34). However, in each of these models, NR4A1 modulated macrophage inflammatory genes  
194 in response to insult or the deletion of *Nr4a1* resulted in an *exaggerated* macrophage  
195 inflammatory phenotype, while we observed *reduced* pro-inflammatory cytokines in *K.*  
196 *pneumoniae* infected *Nr4a1*<sup>-/-</sup> lung tissue, which prompted further study into cell-specific  
197 responses to *K. pneumoniae* infection in the context of NR4A1.

198

199 Given that our work and others indicated *Nr4a1*<sup>-/-</sup> macrophages had a dysregulated tolerization  
200 phenotype, it was unexpected that *Nr4a1*<sup>-/-</sup> macrophages retained *K. pneumoniae* killing ability  
201 (18). Despite genetic profiles noting that *Nr4a1* is induced in neutrophils in response to  
202 inflammatory stimuli, no prior work has determined what role *Nr4a1* has in the neutrophil  
203 response, and the finding that *Nr4a1* is critically important in neutrophils, and not macrophages,  
204 has not been previously reported (30, 31). Specifically, reduced *Nr4a1*<sup>-/-</sup> neutrophil *Mpo*, *Lcn2*,  
205 *Lyz2*, and *Il1 $\beta$*  gene expression suggests that *Nr4a1* deletion impairs antimicrobial responses by

## NR4A1 in *K. pneumoniae* Lung Infection

206 regulating cell-intrinsic early inflammatory gene expression. Alternatively, it may be that  
207 deletion of *Nr4a1* leads to a dysfunctional metabolic response in neutrophils following *K.*  
208 *pneumoniae* infection, as *Nr4a1* has profound impacts on T-cell and macrophage  
209 immunometabolism in several disease models (28, 35, 36). *Nr4a1*, as well as its family members  
210 *Nr4a2* and *Nr4a3*, are also known to be important in the stimulation of lipolysis and glucose  
211 utilization, and all are induced in neutrophils among other lipolysis-related genes in response to  
212 inflammatory stimuli (31, 37). Regardless, further study is necessary to dissect the molecular,  
213 cell-specific mechanism of NR4A1.

214  
215 This work is not without limitations. Most prominently, all data represented here were  
216 performed in mouse models, and thus remains to be determined what role *Nr4a1* possesses in  
217 human neutrophil function. Though prior work suggests that *Nr4a1* is induced in human  
218 neutrophils responding to *E. coli*, human and murine neutrophils differ in numerous ways,  
219 including abundance and protein makeup (30, 38). Further study is required to discern what role,  
220 if any, NR4A1 has in the inflammatory response of human neutrophils. In addition, confirming  
221 the role of *Nr4a1* neutrophil-specific function *in vivo* remains undetermined and requires  
222 experimental approaches not currently available. We must also acknowledge that *in vitro* study  
223 of neutrophils is limited by the short, hours long half-life the cells have *ex vivo* without  
224 manipulation, complicating classical *in vitro* molecular and genetic experimental approaches  
225 (39).

226  
227 Further study into the use of NR4A1 as a potential therapeutic target for host-immunity  
228 responses is also warranted. While the present study shows the deletion of *Nr4a1* to be

## NR4A1 in *K. pneumoniae* Lung Infection

229 detrimental to murine clearance of *K. pneumoniae* pneumonia through loss of neutrophil  
230 function, further study of the ability to rescue or enhance NR4A1 function is arranged in order to  
231 determine this potential, including the use of the NR4A1 agonist, cytosporone B, or the NR4A1  
232 ligand-binding chemical, PDNPA, in the context of *K. pneumoniae* (11, 17, 40).

233

234 The current study also only looked at the role of NR4A1 in *K. pneumoniae* pneumonia. While *K.*  
235 *pneumoniae* is a prominent cause of pneumonia, it is not the only bacteria to do so, nor does *K.*  
236 *pneumoniae* only infect the lungs. More work should be done to determine if NR4A1 has a role  
237 in the response to other infectious bacteria (e.g. *S. pneumoniae*, *H. influenzae*) and viruses  
238 (coronavirus, influenza). Similarly, future studies should also be conducted to determine if the  
239 role of NR4A1 in host immune response is specific to the lungs, or if NR4A1 immune responses  
240 are important for other organ-specific infections.

241

242 The current study illustrates that *Nr4a1* is an important component in host immune response to  
243 *K. pneumoniae* pulmonary infection, specifically in neutrophils, marking NR4A1 as a potential  
244 target for future immunotherapies. Finding potential immunotherapy targets against bacterial  
245 infections is an increasing concern for the public health community as antibiotic-resistant strains  
246 continue to increase. Demonstrating the role NR4A1 has in host immune response to *K.*  
247 *pneumoniae* provides a rational biologic target around which to develop immunotherapies.

248 Additionally, the novel finding that *Nr4a1* is an essential factor in neutrophil-specific response to  
249 *K. pneumoniae* infection can lead to future understanding of neutrophil-specific mechanisms in  
250 response to infection and how to modulate them.

251

## NR4A1 in *K. pneumoniae* Lung Infection

### 252 **METHODS**

#### 253 ***Klebsiella pneumoniae* strain and inoculation**

254 *Klebsiella pneumoniae* strain 396, a K1 serotype, was used for all experiments with a desired  
255 inoculation of  $5 \times 10^3$  colony forming units (CFU) per mouse for *in vivo* experiments and  $2.5 \times 10^6$   
256 CFU per well for *in vitro* experiments. *K. pneumoniae* isolates were stored at  $-80^\circ\text{C}$  in Luria-  
257 Bertani broth (LB; Thermo Fisher Scientific, Waltham, MA) supplemented with 15% glycerol.  
258  
259 Working cultures were grown overnight (18 hours) in 2mL of Trypticase soy broth (TSB; Sigma  
260 Aldrich, St. Louis, MO) at  $37^\circ\text{C}$  and 250 RPM. The next day,  $20\mu\text{L}$  *K. pneumoniae* was sub-  
261 cultured into 2mL TSB and grown for  $\sim 2$  hours at  $37^\circ\text{C}$  and 250 RPM to reach the bacterial  
262 growth log phase and a concentration of  $1 \times 10^9$  CFU  $\text{mL}^{-1}$ . The sub-cultured *K. pneumoniae* was  
263 then spun down at 5000G for 5 minutes and resuspended in 1mL 1XPBS (Gibco, Gaithersburg,  
264 MD). Sub-cultured *K. pneumoniae* was then diluted 1:10000 ( $1 \times 10^5$  concentration) in 1XPBS for  
265 *in vivo* experiments or 1:20 ( $5 \times 10^7$  concentration) for *in vitro* experiments.  $50\mu\text{L}$  of  $1 \times 10^5$   
266 inoculum was administered intratracheally to mice under 1:1 isoflurane for *in vivo* experiments.  
267 For *in vitro* experiments, 5mL of the 1:20 dilution was added to 5mL 1XPBS and  $100\mu\text{L}$  of that  
268 solution was added to the well. Inoculum concentrations were confirmed by dilution series and  
269 LB agar plate CFU calculation.

270

#### 271 **Animal models**

272 Wild-type C57BL/6 mice (Jackson Laboratory, Bar Harbor, ME) and *Nr4a1* global knockout  
273 mice (*Nr4a1*<sup>tm1Jmi/J</sup>; Jackson Laboratory, Bar Harbor, ME) were housed in a pathogen-free  
274 environment with free access to autoclaved water and irradiated pellet food. All experiments

## NR4A1 in *K. pneumoniae* Lung Infection

275 were performed in accordance with the Institutional Animal Care and Use Committee (IACUC)  
276 of the University of Pittsburgh School of Medicine.

277

278 All *in vivo* experiments were performed on sex-matched mice between 8-10 weeks old. At the  
279 start of the experiment, mice were weighed and inoculated with  $5 \times 10^3$  *Klebsiella pneumoniae*  
280 CFUs. After 24 or 48 hours, mice were weighed again and euthanized under isoflurane and a  
281 secondary terminal bleed. The left lobe of the lung and the spleen was extracted into 1mL  
282 1XPBS and homogenized for serial dilution and LB agar plate CFU calculation. The middle  
283 lobe of the right lung was extracted and placed into RNAlater (Invitrogen by Thermo Fisher  
284 Scientific, Carlsbad, CA) for RNA purification and the top and bottom lobes of the right lung  
285 were harvested for flow cytometry.

286

287 For BALF, 9-week-old male mice were inoculated with  $5 \times 10^3$  *Klebsiella pneumoniae* CFUs.  
288 After 5 hours, the mice were euthanized under isoflurane and a secondary terminal bleed and  
289 BALF was acquired by flushing the lungs with 1mL sterile 1XPBS. The 5-hour timepoint was  
290 selected based on prior LPS-induced acute lung injury (ALI) data suggesting neutrophil influx to  
291 the lungs starts as early as 2 hours after insult and as early as 3 hours after a gram-negative  
292 bacterial insult (41–43).

293

### 294 **Flow cytometry**

295 To obtain single lung cell suspensions, lung lobe was collected and digested in DMEM  
296 containing  $4 \text{mg mL}^{-1}$  Collagenase (Sigma Aldrich, St. Louis, MO) and  $0.2 \text{mg mL}^{-1}$  Dnase  
297 (Sigma Aldrich, St. Louis, MO) at  $37^\circ\text{C}$  with agitation for 1 hour, followed by straining digest

## NR4A1 in *K. pneumoniae* Lung Infection

298 through a 70µm filter. Strained cell pellets were collected by centrifugation at 500xg for 5  
299 minutes and red blood cells were lysed using ACK Lysing Buffer (Gibco, Carlsbad, CA)  
300 according to manufacturer recommendations. Total lung cells were enumerated with 0.2%  
301 trypan blue solution and an Invitrogen Countess automated cell counter.  
302  
303 Cells were then subjected to Fc blockade with anti-CD16/CD32 (Thermo Fisher Scientific,  
304 Waltham, MA), washed with 1XPBS, then stained with surface and/or intracellular flow  
305 cytometry antibodies specific to antigens of interest using eBioscience™ Foxp3 / Transcription  
306 Factor Staining Buffer Set (Thermo Fisher Scientific, Waltham, MA) according to manufacturer  
307 protocol. Cells were labeled for detection with surface antibodies to CD11c (HL3, BD  
308 Biosciences, San Jose, CA), SiglecF (E50-2440, BD Biosciences, San Jose, CA), CD11b  
309 (M1/70, Fisher Scientific, Waltham, MA) and Ly6G (1A8, BioLegend, San Diego, CA). Data  
310 acquisition was performed on an LSR Fortessa (SORP, BD Biosciences, San Jose, CA) using  
311 FACSDiva software version 8.0.1. Data was analyzed using FlowJo software version 10.1  
312 (TreeStar, Ashland, OR). Cells were enumerated with 0.2% trypan blue solution and an  
313 Invitrogen Countess automated cell counter. Absolute cell numbers per mouse lung were  
314 enumerated using the total lung cell digest count and the flow cytometry percentage of their  
315 respective cell type.

316

### 317 **Bone marrow macrophage and neutrophil isolation**

318 *Macrophages.*

319 Age matched mice between 8-10 weeks old were euthanized under isoflurane and a secondary  
320 terminal bleed. Both femurs of each mouse were extracted and flushed with DMEM media

## NR4A1 in *K. pneumoniae* Lung Infection

321 (Gibco, Carlsbad, CA) supplemented with 10% fetal bovine serum (FBS) and Penicillin-  
322 Streptomycin-Glutamine through a 100 $\mu$ m filter into a 50mL conical tube. Cells were spun  
323 down at 500xg for 5 minutes, red blood cell lysed with ACK lysis buffer (Gibco, Carlsbad, CA)  
324 for 1 minute, then spun down again at 500g for 5 minutes.

325

326 Again, cells were enumerated with 0.2% trypan blue solution and an Invitrogen Countess  
327 automated cell counter.  $1 \times 10^7$  cells were plated in 10cm dishes in 10mL of DMEM media  
328 supplemented with 10% FBS, Penicillin-Streptomycin-Glutamine, and M-CSF (Life  
329 Technologies, Carlsbad, CA) brought to a concentration of 20ng mL<sup>-1</sup>. Cells were incubated at  
330 37°C and 5.0% CO<sub>2</sub> for 7 days before being harvested in unsupplemented DMEM and used in  
331 the bacterial killing assay.

332

333 *Neutrophils.*

334 Age matched mice between 8-10 weeks old were euthanized under isoflurane and a secondary  
335 terminal bleed. The isolation protocol was modified based on the neutrophil isolation protocol  
336 developed by Swamydas and Lionakis (44). Both femurs of each mouse were extracted and  
337 flushed with RPMI 1640 media (Fisher Scientific, Waltham, MA) supplemented with 10% FBS  
338 and 1mM EDTA (Gibco, Carlsbad, CA) through a 100 $\mu$ m filter into a 50mL conical tube. Cells  
339 were centrifuged for 7 minutes at 427xg and 4°C. Cells were then red blood cell lysed by adding  
340 2mL 0.2% NaCl for 20 seconds and 2mL 1.6% NaCl. Cells were spun down again at the  
341 previous settings, washed with the supplemented RPMI media, and spun again. Cells were  
342 resuspended in 3mL PBS and counted using 0.2% trypan blue solution and an Invitrogen  
343 Countess automated cell counter.

## NR4A1 in *K. pneumoniae* Lung Infection

344

345 Once counted, cells were overlaid on a 40%/70% Percoll (Fisher Scientific, Waltham, MA)  
346 gradient and centrifuged for 30 minutes at 427xg and 28°C. After 30 minutes, neutrophils were  
347 collected from the interface of the 40% and 70% Percoll layers, washed twice with  
348 unsupplemented RPMI 1640 and spun at 427xg and 4°C for 7 minutes, and resuspended in 1mL  
349 PBS. Neutrophils were counted and then plated in a 96-well plate at  $2.5 \times 10^5$  neutrophils/well.  
350 Neutrophils were incubated at 37°C and 5.0% CO<sub>2</sub> for a 1-hour recovery period before being  
351 used in a bacterial killing assay.

352

### 353 **Bacterial killing assay**

354 Both bone marrow macrophages and bone marrow neutrophils were individually plated in a 96-  
355 well plate at  $2.5 \times 10^5$  cells per well in their respective media. *K. pneumoniae* was added at a  
356 concentration of  $2.5 \times 10^6$  CFU per well for a multiplicity of infection (MOI) of 10. The plates  
357 were then incubated at 37°C and 5.0% CO<sub>2</sub> on an orbital shaker set to 250 RPM.

358

359 Supernatants were collected at 30 and 60 minutes (for neutrophils) or 30 and 60 minutes (for  
360 macrophages) and the bacterial burdens of each well were calculated using serial dilutions of the  
361 supernatants and LB agar plate CFU calculations. In addition, cells were lysed using RNA lysis  
362 buffer (Invitrogen by Thermo Fisher Scientific, Carlsbad, CA) and stored for RNA extraction  
363 and qPCR analysis.

364

### 365 **RNA extraction and qPCR**



## NR4A1 in *K. pneumoniae* Lung Infection

366 For lung gene expression, the middle lobe of the right lung lobe was homogenized in 1mL of  
367 RNA lysis buffer (Invitrogen by Thermo Fisher Scientific, Carlsbad, CA) and RNA was purified  
368 per the manufacturer's procedures. Cellular RNA was extracted by aspirating media and plating  
369 300 $\mu$ L of the same RNA lysis buffer onto the cells directly after the killing assay. RNA was  
370 purified per the manufacturer's procedures. RNA was quantified using the Nanodrop 2000  
371 (Thermo Fisher Scientific, Waltham, MA) and 40ng of RNA for lung or 5-10ng of RNA for cells  
372 was converted to cDNA with iScript (Biorad, Hercules, CA). Real-time PCR was done on the  
373 cDNA with SYBR green master mix (Biorad, Hercules, CA) or Taqman master mix (Applied  
374 Biosystems, Foster City, CA) depending on primer probe. Primer probe assays were from  
375 ordered from Applied Biosciences or IDT. All lung gene expression was compared to the  
376 housekeeper gene hypoxanthine-guanine phosphoribosyltransferase (HPRT) and all cellular gene  
377 expression was compared to the housekeeper gene beta-2-microglobulin (B2M).

378

### 379 **ELISA protein analysis**

380 For protein analysis of the whole lung, the left lung lobe was homogenized in 1mL of PBS and  
381 then diluted 1:10 to use in the IL1- $\beta$  (Thermo Fisher Scientific, Waltham, MA) and MPO (R&D  
382 Systems, Minneapolis, MN) ELISAs. After collection of BALF, the BALF was spun at 500xg  
383 for 5 minutes to separate lung cells from the fluid. Undiluted BALF was used in the IL1- $\beta$  and  
384 MPO ELISAs. All ELISAs were conducted per the manufacturer's procedures. Plates were read  
385 at 450nm with a correctional wavelength of 540nm (Synergy H1, BioTek, Winooski, VT).

386

387 **Statistical analysis.** Investigators were not blinded to treatment but were blinded to  
388 individual/group during data analysis. All *in vivo* and *in vitro* statistical analyses were

## NR4A1 in *K. pneumoniae* Lung Infection

389 performed using Prism 7 (GraphPad, San Diego, CA). Briefly, all data are presented with mean  $\pm$   
390 SEM. All studies comparing two groups were analyzed by two-sided student's *t*-test or by the  
391 Mann-Whitney *U* test when the *F*-value was significant. All statistical analyses considered  $P <$   
392 0.05 significant.

393

### 394 **ACKNOWLEDGEMENTS**

395 This work was supported by funding from the National Institutes of Health K08HL128809  
396 (B.T.C.) and in part by UPMC Children's Hospital of Pittsburgh. Special thanks to Dr. Taylor  
397 Eddens for insightful discussions of this work.

398

### 399 **CONFLICT OF INTEREST**

400 The authors declare no conflict of interest.

## NR4A1 in *K. pneumoniae* Lung Infection

### 401 REFERENCES

- 402 1. Magill SS, Edwards JR, Bamberg W, Beldavs ZG, Dumyati G, Kainer MA, Lynfield R,  
403 Maloney M, McAllister-Hollod L, Nadle J, Ray SM, Thompson DL, Wilson LE, Fridkin  
404 SK, Emerging Infections Program Healthcare-Associated Infections and Antimicrobial Use  
405 Prevalence Survey Team. 2014. Multistate point-prevalence survey of health care-  
406 associated infections. *N Engl J Med* 370:1198–1208.
- 407 2. Sakkas H, Bozidis P, Ilia A, Mpekoulis G, Papadopoulou C. 2019. Antimicrobial  
408 Resistance in Bacterial Pathogens and Detection of Carbapenemases in *Klebsiella*  
409 *pneumoniae* Isolates from Hospital Wastewater. *3. Antibiotics* 8:85.
- 410 3. Paterson DL, Bonomo RA. 2005. Extended-Spectrum  $\beta$ -Lactamases: a Clinical Update.  
411 *CMR* 18:657–686.
- 412 4. Estrada SM, Thagard AS, Dehart MJ, Damicis JR, Dornisch EM, Ippolito DL, Burd I,  
413 Napolitano PG, Ieronimakis N. 2020. The orphan nuclear receptor Nr4a1 mediates perinatal  
414 neuroinflammation in a murine model of preterm labor. *Cell death & disease* 11:11.
- 415 5. Rothe T, Ipseiz N, Faas M, Lang S, Perez-Branguli F, Metzger D, Ichinose H, Winner B,  
416 Schett G, Krönke G. 2017. The Nuclear Receptor Nr4a1 Acts as a Microglia Rheostat and  
417 Serves as a Therapeutic Target in Autoimmune-Driven Central Nervous System  
418 Inflammation. *J Immunol* 198:3878–3885.
- 419 6. Hamers AAJ, Vos M, Rassam F, Marinković G, Marincovic G, Kurakula K, van Gorp PJ,  
420 de Winther MPJ, Gijbels MJJ, de Waard V, de Vries CJM. 2012. Bone marrow-specific  
421 deficiency of nuclear receptor Nur77 enhances atherosclerosis. *Circ Res* 110:428–438.

## NR4A1 in *K. pneumoniae* Lung Infection

- 422 7. Hamers AAJ, Hanna RN, Nowyhed H, Hedrick CC, de Vries CJM. 2013. NR4A Nuclear  
423 Receptors in Immunity and Atherosclerosis. *Curr Opin Lipidol* 24:381–385.
- 424 8. Reddy AT, Lakshmi SP, Banno A, Jadhav SK, Pulikkal Kadamberi I, Kim SC, Reddy RC.  
425 2020. Cigarette smoke downregulates Nur77 to exacerbate inflammation in chronic  
426 obstructive pulmonary disease (COPD). *PLoS One* 15.
- 427 9. Kurakula K, Vos M, Logiantara A, Roelofs JJ, Nieuwenhuis MA, Koppelman GH, Postma  
428 DS, Rijt LS van, Vries CJM de. 2015. Nuclear Receptor Nur77 Attenuates Airway  
429 Inflammation in Mice by Suppressing NF- $\kappa$ B Activity in Lung Epithelial Cells. *The Journal*  
430 *of Immunology* 195:1388–1398.
- 431 10. Banno A, Lakshmi SP, Reddy AT, Kim SC, Reddy RC. 2019. Key Functions and  
432 Therapeutic Prospects of Nur77 in Inflammation Related Lung Diseases. *Am J Pathol*  
433 189:482–491.
- 434 11. Egarnes B, Blanchet M-R, Gosselin J. 2017. Treatment with the NR4A1 agonist  
435 cytosporone B controls influenza virus infection and improves pulmonary function in  
436 infected mice. *PLOS ONE* 12:e0186639.
- 437 12. Tacke R, Hilgendorf I, Garner H, Waterborg C, Park K, Nowyhed H, Hanna RN, Wu R,  
438 Swirski FK, Geissmann F, Hedrick CC. 2015. The transcription factor NR4A1 is essential  
439 for the development of a novel macrophage subset in the thymus. *Sci Rep* 5:10055.
- 440 13. Hanna RN, Carlin LM, Hubbeling HG, Nackiewicz D, Green AM, Punt JA, Geissmann F,  
441 Hedrick CC. 2011. The transcription factor NR4A1 (Nur77) controls bone marrow  
442 differentiation and the survival of Ly6C – monocytes. 8. *Nature Immunology* 12:778–785.

## NR4A1 in *K. pneumoniae* Lung Infection

- 443 14. Pei L, Castrillo A, Tontonoz P. 2006. Regulation of macrophage inflammatory gene  
444 expression by the orphan nuclear receptor Nur77. *Mol Endocrinol* 20:786–794.
- 445 15. Hanna RN, Shaked I, Hubbeling HG, Punt JA, Wu R, Herrley E, Zaugg C, Pei H,  
446 Geissmann F, Ley K, Hedrick CC. 2012. NR4A1 (Nur77) deletion polarizes macrophages  
447 toward an inflammatory phenotype and increases atherosclerosis. *Circ Res* 110:416–427.
- 448 16. Shaked I, Hanna RN, Shaked H, Chodaczek G, Nowyhed HN, Tweet G, Tacke R, Basat  
449 AB, Mikulski Z, Togher S, Miller J, Blatchley A, Salek-Ardakani S, Darvas M, Kaikkonen  
450 MU, Thomas G, Lai-Wing-Sun S, Rezk A, Bar-Or A, Glass CK, Bandukwala H, Hedrick  
451 CC. 2015. The orphan nuclear receptor Nr4a1 couples sympathetic and inflammatory cues  
452 in CNS-recruited macrophages to limit neuroinflammation. *Nat Immunol* 16:1228–1234.
- 453 17. Li L, Liu Y, Chen H, Li F, Wu J, Zhang H, He J, Xing Y, Chen Y, Wang W, Tian X, Li A,  
454 Zhang Q, Huang P, Han J, Lin T, Wu Q. 2015. Impeding the interaction between Nur77 and  
455 p38 reduces LPS-induced inflammation. *Nat Chem Biol* 11:339–346.
- 456 18. Henkel M, Partyka J, Gregory AD, Forno E, Cho MH, Eddens T, Tout AR, Salamacha N,  
457 Horne W, Rao KS, Wu Y, Alcorn JF, Kostka D, Hirsch R, Celedón JC, Shapiro SD, Kolls  
458 JK, Campfield BT. 2020. FSTL-1 Attenuation Causes Spontaneous Smoke-Resistant  
459 Pulmonary Emphysema. *Am J Respir Crit Care Med* 201:934–945.
- 460 19. Hamers AAJ, Uleman S, van Tiel CM, Kruijswijk D, van Stalborch A-M, Huveneers S, de  
461 Vries CJM, van 't Veer C. 2014. Limited Role of Nuclear Receptor Nur77 in *Escherichia*  
462 *coli*-Induced Peritonitis. *Infect Immun* 82:253–264.

## NR4A1 in *K. pneumoniae* Lung Infection

- 463 20. Hamers AAJ, Dam L van, Duarte JMT, Vos M, Marinković G, Tiel CM van, Meijer SL,  
464 Stalborch A-M van, Huveneers S, Velde AA te, Jonge WJ de, Vries CJM de. 2015.  
465 Deficiency of Nuclear Receptor Nur77 Aggravates Mouse Experimental Colitis by  
466 Increased NFκB Activity in Macrophages. PLOS ONE 10:e0133598.
- 467 21. Cui P, Wu S, Xu X, Ye H, Hou J, Liu X, Wang H, Fang X. 2019. Deficiency of the  
468 Transcription Factor NR4A1 Enhances Bacterial Clearance and Prevents Lung Injury  
469 During Escherichia Coli Pneumonia. Shock 51:787–794.
- 470 22. Hirche TO, Gaut JP, Heinecke JW, Belaouaj A. 2005. Myeloperoxidase plays critical roles  
471 in killing *Klebsiella pneumoniae* and inactivating neutrophil elastase: effects on host  
472 defense. J Immunol 174:1557–1565.
- 473 23. Bengoechea JA, Sa Pessoa J. 2019. *Klebsiella pneumoniae* infection biology: living to  
474 counteract host defences. FEMS Microbiol Rev 43:123–144.
- 475 24. Broug-Holub E, Toews GB, van Iwaarden JF, Strieter RM, Kunkel SL, Paine R, Standiford  
476 TJ. 1997. Alveolar macrophages are required for protective pulmonary defenses in murine  
477 *Klebsiella pneumoniae*: elimination of alveolar macrophages increases neutrophil  
478 recruitment but decreases bacterial clearance and survival. Infect Immun 65:1139–1146.
- 479 25. Kovach MA, Standiford TJ. 2012. The function of neutrophils in sepsis. Curr Opin Infect  
480 Dis 25:321–327.
- 481 26. Ye P, Garvey PB, Zhang P, Nelson S, Bagby G, Summer WR, Schwarzenberger P, Shellito  
482 JE, Kolls JK. 2001. Interleukin-17 and Lung Host Defense against *Klebsiella pneumoniae*  
483 Infection. Am J Respir Cell Mol Biol 25:335–340.

## NR4A1 in *K. pneumoniae* Lung Infection

- 484 27. Moore TA, Perry ML, Getsoian AG, Newstead MW, Standiford TJ. 2002. Divergent Role  
485 of Gamma Interferon in a Murine Model of Pulmonary versus Systemic Klebsiella  
486 pneumoniae Infection. *Infect Immun* 70:6310–6318.
- 487 28. Liu X, Wang Y, Lu H, Li J, Yan X, Xiao M, Hao J, Alekseev A, Khong H, Chen T, Huang  
488 R, Wu J, Zhao Q, Wu Q, Xu S, Wang X, Jin W, Yu S, Wang Y, Wei L, Wang A, Zhong B,  
489 Ni L, Liu X, Nurieva R, Ye L, Tian Q, Bian X-W, Dong C. 2019. Genome-wide analysis  
490 identifies NR4A1 as a key mediator of T cell dysfunction. 7749. *Nature* 567:525–529.
- 491 29. Sekiya T, Kashiwagi I, Yoshida R, Fukaya T, Morita R, Kimura A, Ichinose H, Metzger D,  
492 Chambon P, Yoshimura A. 2013. Nr4a receptors are essential for thymic regulatory T cell  
493 development and immune homeostasis. *Nat Immunol* 14:230–237.
- 494 30. Zhang X, Kluger Y, Nakayama Y, Poddar R, Whitney C, DeTora A, Weissman SM,  
495 Newburger PE. 2004. Gene expression in mature neutrophils: early responses to  
496 inflammatory stimuli. *Journal of Leukocyte Biology* 75:358–372.
- 497 31. Ericson JA, Duffau P, Yasuda K, Ortiz-Lopez A, Rothamel K, Rifkin IR, Monach PA,  
498 ImmGen Consortium. 2014. Gene expression during the generation and activation of mouse  
499 neutrophils: implication of novel functional and regulatory pathways. *PLoS ONE*  
500 9:e108553.
- 501 32. Schaum N, Karkanias J, Neff NF, May AP, Quake SR, Wyss-Coray T, Darmanis S, Batson  
502 J, Botvinnik O, Chen MB, Chen S, Green F, Jones RC, Maynard A, Penland L, Pisco AO,  
503 Sit RV, Stanley GM, Webber JT, Zanini F, Baghel AS, Bakerman I, Bansal I, Berdnik D,  
504 Bilen B, Brownfield D, Cain C, Chen MB, Chen S, Cho M, Cirolia G, Conley SD,

## NR4A1 in *K. pneumoniae* Lung Infection

505 Darmanis S, Demers A, Demir K, de Morree A, Divita T, du Bois H, Dulgeroff LBT, Ebadi  
506 H, Espinoza FH, Fish M, Gan Q, George BM, Gillich A, Green F, Genetiano G, Gu X,  
507 Gulati GS, Hang Y, Hosseinzadeh S, Huang A, Iram T, Isobe T, Ives F, Jones RC, Kao KS,  
508 Karnam G, Kershner AM, Kiss BM, Kong W, Kumar ME, Lam JY, Lee DP, Lee SE, Li G,  
509 Li Q, Liu L, Lo A, Lu W-J, Manjunath A, May AP, May KL, May OL, Maynard A, McKay  
510 M, Metzger RJ, Mignardi M, Min D, Nabhan AN, Neff NF, Ng KM, Noh J, Patkar R, Peng  
511 WC, Penland L, Puccinelli R, Rulifson EJ, Schaum N, Sikandar SS, Sinha R, Sit RV, Szade  
512 K, Tan W, Tato C, Tellez K, Travaglini KJ, Tropini C, Waldburger L, van Weele LJ,  
513 Wosczyzna MN, Xiang J, Xue S, Youngyunpipatkul J, Zanini F, Zardeneta ME, Zhang F,  
514 Zhou L, Bansal I, Chen S, Cho M, Cirolia G, Darmanis S, Demers A, Divita T, Ebadi H,  
515 Genetiano G, Green F, Hosseinzadeh S, Ives F, Lo A, May AP, Maynard A, McKay M,  
516 Neff NF, Penland L, Sit RV, Tan W, Waldburger L, Youngyunpipatkul J, Batson J,  
517 Botvinnik O, Castro P, Croote D, Darmanis S, DeRisi JL, Karkanias J, Pisco AO, Stanley  
518 GM, Webber JT, Zanini F, Baghel AS, Bakerman I, Batson J, Bilen B, Botvinnik O,  
519 Brownfield D, Chen MB, Darmanis S, Demir K, de Morree A, Ebadi H, Espinoza FH, Fish  
520 M, Gan Q, George BM, Gillich A, Gu X, Gulati GS, Hang Y, Huang A, Iram T, Isobe T,  
521 Karnam G, Kershner AM, Kiss BM, Kong W, Kuo CS, Lam JY, Lehallier B, Li G, Li Q,  
522 Liu L, Lu W-J, Min D, Nabhan AN, Ng KM, Nguyen PK, Patkar R, Peng WC, Penland L,  
523 Rulifson EJ, Schaum N, Sikandar SS, Sinha R, Szade K, Tan SY, Tellez K, Travaglini KJ,  
524 Tropini C, van Weele LJ, Wang BM, Wosczyzna MN, Xiang J, Yousef H, Zhou L, Batson J,  
525 Botvinnik O, Chen S, Darmanis S, Green F, May AP, Maynard A, Pisco AO, Quake SR,  
526 Schaum N, Stanley GM, Webber JT, Wyss-Coray T, Zanini F, Beachy PA, Chan CKF, de  
527 Morree A, George BM, Gulati GS, Hang Y, Huang KC, Iram T, Isobe T, Kershner AM,



## NR4A1 in *K. pneumoniae* Lung Infection

- 528 Kiss BM, Kong W, Li G, Li Q, Liu L, Lu W-J, Nabhan AN, Ng KM, Nguyen PK, Peng  
529 WC, Rulifson EJ, Schaum N, Sikandar SS, Sinha R, Szade K, Travaglini KJ, Tropini C,  
530 Wang BM, Weinberg K, Wosczyzna MN, Wu SM, Yousef H, Barres BA, Beachy PA, Chan  
531 CKF, Clarke MF, Darmanis S, Huang KC, Karkanias J, Kim SK, Krasnow MA, Kumar  
532 ME, Kuo CS, May AP, Metzger RJ, Neff NF, Nusse R, Nguyen PK, Rando TA,  
533 Sonnenburg J, Wang BM, Weinberg K, Weissman IL, Wu SM, Quake SR, Wyss-Coray T,  
534 The Tabula Muris Consortium, Overall coordination, Logistical coordination, Organ  
535 collection and processing, Library preparation and sequencing, Computational data  
536 analysis, Cell type annotation, Writing group, Supplemental text writing group, Principal  
537 investigators. 2018. Single-cell transcriptomics of 20 mouse organs creates a Tabula Muris.  
538 7727. *Nature* 562:367–372.
- 539 33. Li X-M, Zhang S, He X-S, Guo P-D, Lu X-X, Wang J-R, Li J-M, Wu H. 2016. Nur77-  
540 mediated TRAF6 signalling protects against LPS-induced sepsis in mice. *J Inflamm (Lond)*  
541 13.
- 542 34. Hamers AAJ, Argmann C, Moerland PD, Koenis DS, Marinković G, Sokolović M, de Vos  
543 AF, de Vries CJM, van Tiel CM. 2016. Nur77-deficiency in bone marrow-derived  
544 macrophages modulates inflammatory responses, extracellular matrix homeostasis,  
545 phagocytosis and tolerance. *BMC Genomics* 17:162.
- 546 35. Liebmann M, Hucke S, Koch K, Eschborn M, Ghelman J, Chasan AI, Glander S, Schädlich  
547 M, Kuhlencord M, Daber NM, Eveslage M, Beyer M, Dietrich M, Albrecht P, Stoll M,  
548 Busch KB, Wiendl H, Roth J, Kuhlmann T, Klotz L. 2018. Nur77 serves as a molecular

## NR4A1 in *K. pneumoniae* Lung Infection

- 549           brake of the metabolic switch during T cell activation to restrict autoimmunity. PNAS  
550           115:E8017–E8026.
- 551   36.   Koenis DS, Medzikovic L, van Loenen PB, van Weeghel M, Huveneers S, Vos M, Evers-  
552           van Gogh IJ, Van den Bossche J, Speijer D, Kim Y, Wessels L, Zelcer N, Zwart W,  
553           Kalkhoven E, de Vries CJ. 2018. Nuclear Receptor Nur77 Limits the Macrophage  
554           Inflammatory Response through Transcriptional Reprogramming of Mitochondrial  
555           Metabolism. *Cell Rep* 24:2127-2140.e7.
- 556   37.   Zhao Y, Bruemmer D. 2010. NR4A orphan nuclear receptors: transcriptional regulators of  
557           gene expression in metabolism and vascular biology. *Arterioscler Thromb Vasc Biol*  
558           30:1535–1541.
- 559   38.   Mestas J, Hughes CCW. 2004. Of mice and not men: differences between mouse and  
560           human immunology. *J Immunol* 172:2731–2738.
- 561   39.   Boxio R, Bossenmeyer-Pourié C, Steinckwich N, Dournon C, Nüße O. 2004. Mouse bone  
562           marrow contains large numbers of functionally competent neutrophils. *Journal of*  
563           *Leukocyte Biology* 75:604–611.
- 564   40.   Zhan Y, Du X, Chen H, Liu J, Zhao B, Huang D, Li G, Xu Q, Zhang M, Weimer BC, Chen  
565           D, Cheng Z, Zhang L, Li Q, Li S, Zheng Z, Song S, Huang Y, Ye Z, Su W, Lin S-C, Shen  
566           Y, Wu Q. 2008. Cyclosporine B is an agonist for nuclear orphan receptor Nur77. *Nat Chem*  
567           *Biol* 4:548–556.

## NR4A1 in *K. pneumoniae* Lung Infection

- 568 41. Szarka RJ, Wang N, Gordon L, Nation PN, Smith RH. 1997. A murine model of pulmonary  
569 damage induced by lipopolysaccharide via intranasal instillation. *Journal of Immunological*  
570 *Methods* 202:49–57.
- 571 42. Dubin PJ, Martz A, Eisenstatt JR, Fox MD, Logar A, Kolls JK. 2012. Interleukin-23-  
572 Mediated Inflammation in *Pseudomonas aeruginosa* Pulmonary Infection. *Infect Immun*  
573 80:398–409.
- 574 43. Greenberger MJ, Strieter RM, Kunkel SL, Danforth JM, Laichalk LL, McGillicuddy DC,  
575 Standiford TJ. 1996. Neutralization of Macrophage Inflammatory Protein-2 Attenuates  
576 Neutrophil Recruitment and Bacterial Clearance in Murine *Klebsiella* Pneumonia. *J Infect*  
577 *Dis* 173:159–165.
- 578 44. Swamydas M, Lionakis MS. 2013. Isolation, purification and labeling of mouse bone  
579 marrow neutrophils for functional studies and adoptive transfer experiments. *J Vis Exp*  
580 e50586.
- 581

## NR4A1 in *K. pneumoniae* Lung Infection

### 582 **Figure 1. *Nr4a1*<sup>-/-</sup> mice are more susceptible to *Klebsiella pneumoniae* pulmonary infection**

583 The (a) lung burden and (b) spleen burden of Wild-type (WT, *n*=6) and *Nr4a1* knockout (*Nr4a1*<sup>-/-</sup>  
584 <sup>-/-</sup>, *n*=8) mice 24 hours post pulmonary *K. pneumoniae* infection. The (c) *K. pneumoniae* lung  
585 burden and (d) spleen burden in WT (*n*=7) and *Nr4a1*<sup>-/-</sup> (*n*=7) mice 48 hours post pulmonary  
586 infection. Panels (a) and (b) for the 24-hour lung and spleen burdens are representative of two  
587 experiments. Panels (c) and (d) for the 48-hour lung and spleen burdens are pooled from two  
588 experiments. Significance was determined by the Student's *t*-test. \**P* < 0.05, \*\**P* < 0.01

589

### 590 **Figure 2. *Nr4a1*<sup>-/-</sup> mice have selectively reduced transcription of pro-inflammatory** 591 **cytokines and chemokines in BAL cells early post-infection**

592 Transcript abundance for pro-inflammatory cytokines (a) *Il1β*, (b) *Il6*, and (c) *Tnfa*, as well as  
593 chemokines (d) *Cxcl1*, (e) *Cxcl2*, and (f) *Cxcl5* from the BAL fluid cells of WT (*n*=5) and  
594 *Nr4a1*<sup>-/-</sup> (*n*=5) mice 5 hours after *K. pneumoniae* infection. These data are representative of two  
595 experiments. All gene transcripts were compared to the housekeeper beta-2-microglobulin  
596 (*B2M*). Significance was determined by the Student's *t*-test. \**P* < 0.05, \*\**P* < 0.01

597

### 598 **Figure 3. *Nr4a1*<sup>-/-</sup> mice have reduced IL1β and MPO lung protein after *K. pneumoniae* lung** 599 **infection**

600 *Nr4a1*<sup>-/-</sup> mice (*n*=6) have reduced (a) IL1β 5 hours post-infection with *K. pneumoniae* compared  
601 to WT controls (*n*=5), though (b) MPO is not significantly reduced. By 24 hours post infection,  
602 *Nr4a1*<sup>-/-</sup> mice (*n*=6) have significantly reduced (c) IL1β and (d) MPO protein compared to WT  
603 mice controls (*n*=5). These data are all representative of two experiments. Significance was  
604 determined by the Student's *t*-test. \**P* < 0.05, \*\**P* < 0.01, \*\*\**P* < 0.005

## NR4A1 in *K. pneumoniae* Lung Infection

605

### 606 **Figure 4. *Nr4a1* is essential for neutrophil anti-bactericidal function**

607 **(a)** *Nr4a1* gene expression of unstimulated ( $n=5$ ) and *K. pneumoniae* co-cultured ( $n=5$ ) WT  
608 neutrophils. *Nr4a1* gene expression is significantly increased in WT neutrophils co-cultured  
609 with *K. pneumoniae*. The **(b)** *K. pneumoniae* burden from the supernatants of WT ( $n=9$ ) and  
610 *Nr4a1*<sup>-/-</sup> ( $n=9$ ) neutrophils at 30 minutes and 60 minutes (WT  $n=9$ , *Nr4a1*<sup>-/-</sup>  $n=8$ ) after co-culture  
611 with *K. pneumoniae*. **(c)** *Nr4a1* gene expression of WT ( $n=5$ ) and *Nr4a1*<sup>-/-</sup> ( $n=5$ ) neutrophils 60  
612 minutes after *K. pneumoniae* co-culture. WT neutrophils have significantly more *Nr4a1* gene  
613 transcript than *Nr4a1*<sup>-/-</sup> neutrophils. All gene transcripts were normalized to *B2M*. The burden  
614 results in panel **(b)** are pooled from two separate experiments and representative of five  
615 experiments total. Panels **(a)** and **(c)** are representative of three experiments. Significance was  
616 determined by the Student's *t*-test. \* $P < 0.05$ , \*\* $P < 0.01$ , \*\*\*\* $P < 0.0001$

617

### 618 **Figure 5. *Nr4a1*<sup>-/-</sup> neutrophils have decreased inflammatory gene expression following *K.* 619 *pneumoniae* infection**

620 *Nr4a1*<sup>-/-</sup> neutrophils ( $n=3$ ) have decreased genetic expression of **(a)** *Il1β* and neutrophil-specific  
621 genes **(b)** *Lcn2*, **(c)** *Mpo*, and **(d)** *Lyz2* compared to WT controls ( $n=5$ ). These data are all  
622 representative of five experiments. All gene transcripts were normalized to *B2M*. Significance  
623 was determined by the Mann-Whitney *U*-test. \* $P < 0.05$

624

### 625 **Supplemental Figure 1. *Nr4a1*<sup>-/-</sup> and WT mice have similar immune cell abundance** 626 **following *K. pneumoniae* lung infection**

## NR4A1 in *K. pneumoniae* Lung Infection

627 **(a)** The total amount of lung cells from WT ( $n=5$ ) and *Nr4a1*<sup>-/-</sup> ( $n=6$ ) mice 24 hours post  
628 infection. The **(b)** total CD45<sup>+</sup>/CD11b<sup>+</sup>/CD11c<sup>+</sup> (inflammatory macrophages), **(c)**  
629 CD45<sup>+</sup>/CD11c<sup>+</sup>/SiglecF<sup>+</sup> (alveolar macrophages), and **(d)** CD45<sup>+</sup>/CD11b<sup>+</sup>/Ly6G<sup>+</sup> (neutrophils)  
630 24 hours after infection. Data are representative of two individual experiments.

631

### 632 **Supplemental Figure 2. *Nr4a1*<sup>-/-</sup> and WT mice have similar cytokine expression after 24** 633 **hours of *K. pneumoniae* lung infection**

634 Transcript abundance for cytokines **(a)** *Il1β*, **(b)** *Tnfa*, and **(c)** *Il6*, as well as the neutrophil-  
635 specific gene **(d)** *Lcn2* from WT ( $n=6$ ) and *Nr4a1*<sup>-/-</sup> ( $n=8$ ) whole lung. No significant differences  
636 were observed between genotypes 24 hours after *K. pneumoniae* pulmonary infection. All gene  
637 transcripts were normalized to *HPRT*.

638

### 639 **Supplemental Figure 3. FACS gating strategy for myeloid cells**

640

### 641 **Supplemental Figure 4. *Nr4a1*<sup>-/-</sup> macrophages retain bactericidal function *in vitro***

642 **(a)** *K pneumoniae* burden from the supernatants of WT ( $n=5$ ) and *Nr4a1*<sup>-/-</sup> ( $n=4$ ) bone marrow  
643 macrophages 30 minutes and 60 minutes after co-culture with *K. pneumoniae*. The gene  
644 transcript for **(b)** *Il1β*, **(c)** *Cxcl2*, and **(d)** *Il6* at 60 minutes exhibits no difference between WT  
645 and *Nr4a1*<sup>-/-</sup> mice. All gene transcripts were normalized to *B2M*.

646

a

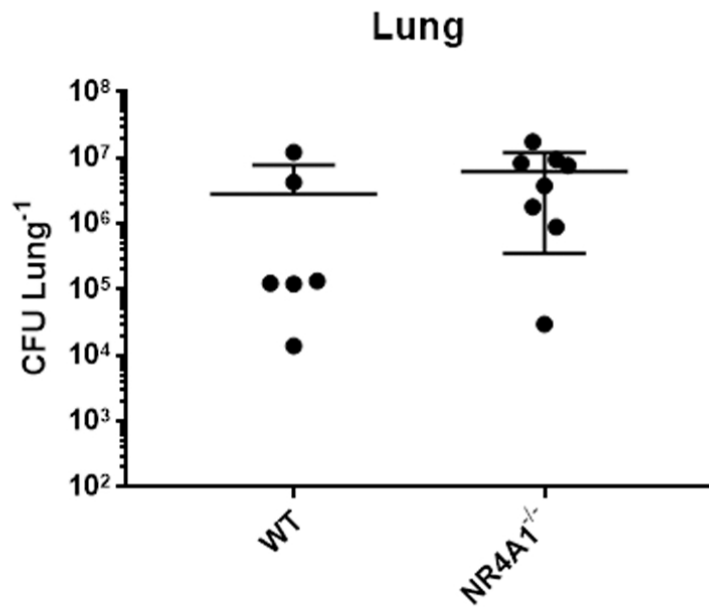

b

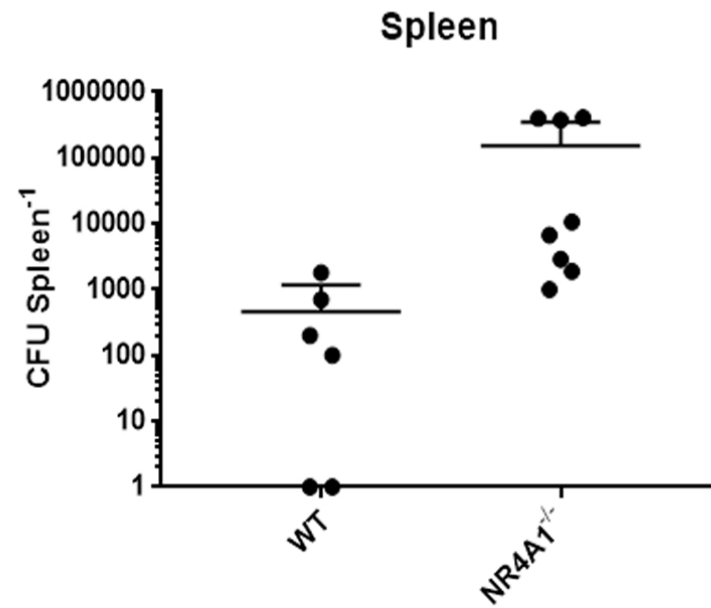

c

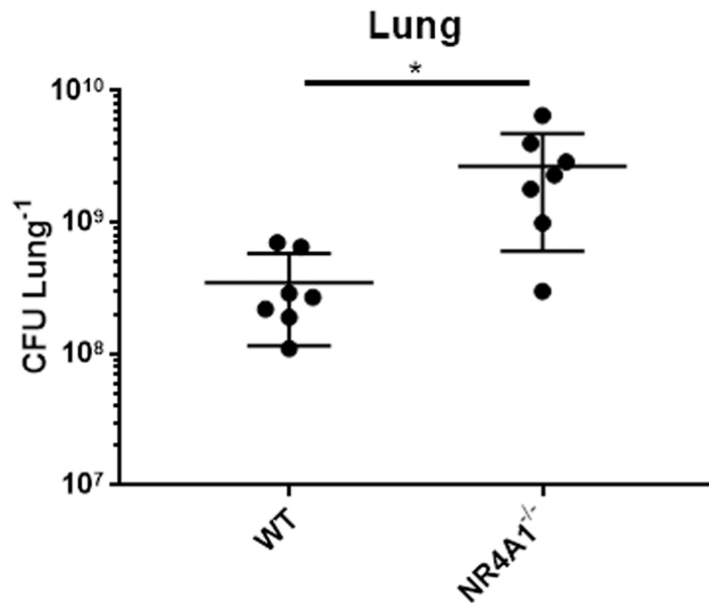

d

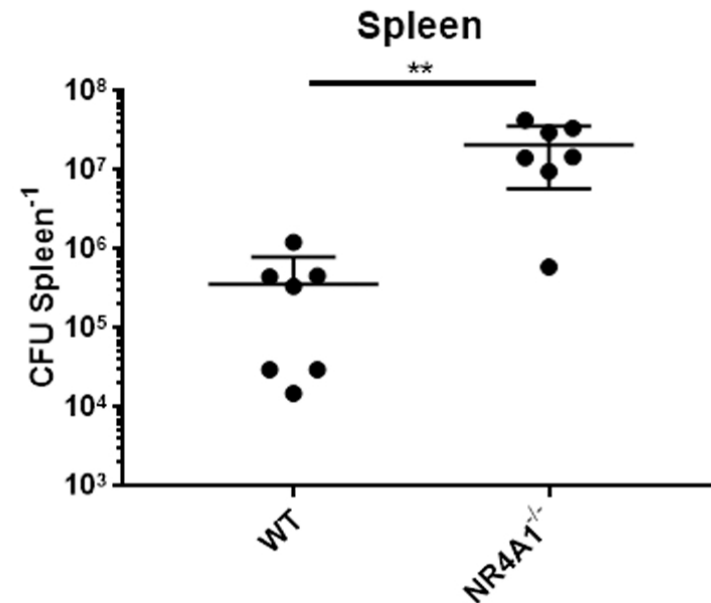

**Figure 1. *Nr4a1*<sup>-/-</sup> mice are more susceptible to *Klebsiella pneumoniae* pulmonary infection**

The (a) lung burden and (b) spleen burden of Wild-type (WT, n=6) and *Nr4a1* knockout (*Nr4a1*<sup>-/-</sup>, n=8) mice 24 hours post pulmonary *K. pneumoniae* infection. The (c) *K. pneumoniae* lung burden and (d) spleen burden in WT (n=7) and *Nr4a1*<sup>-/-</sup> (n=7) mice 48 hours post pulmonary infection. Panels (a) and (b) for the 24-hour lung and spleen burdens are representative of two experiments. Panels (c) and (d) for the 48-hour lung and spleen burdens are pooled from two experiments. Significance was determined by the Student's *t*-test. \**P* < 0.05, \*\**P* < 0.01

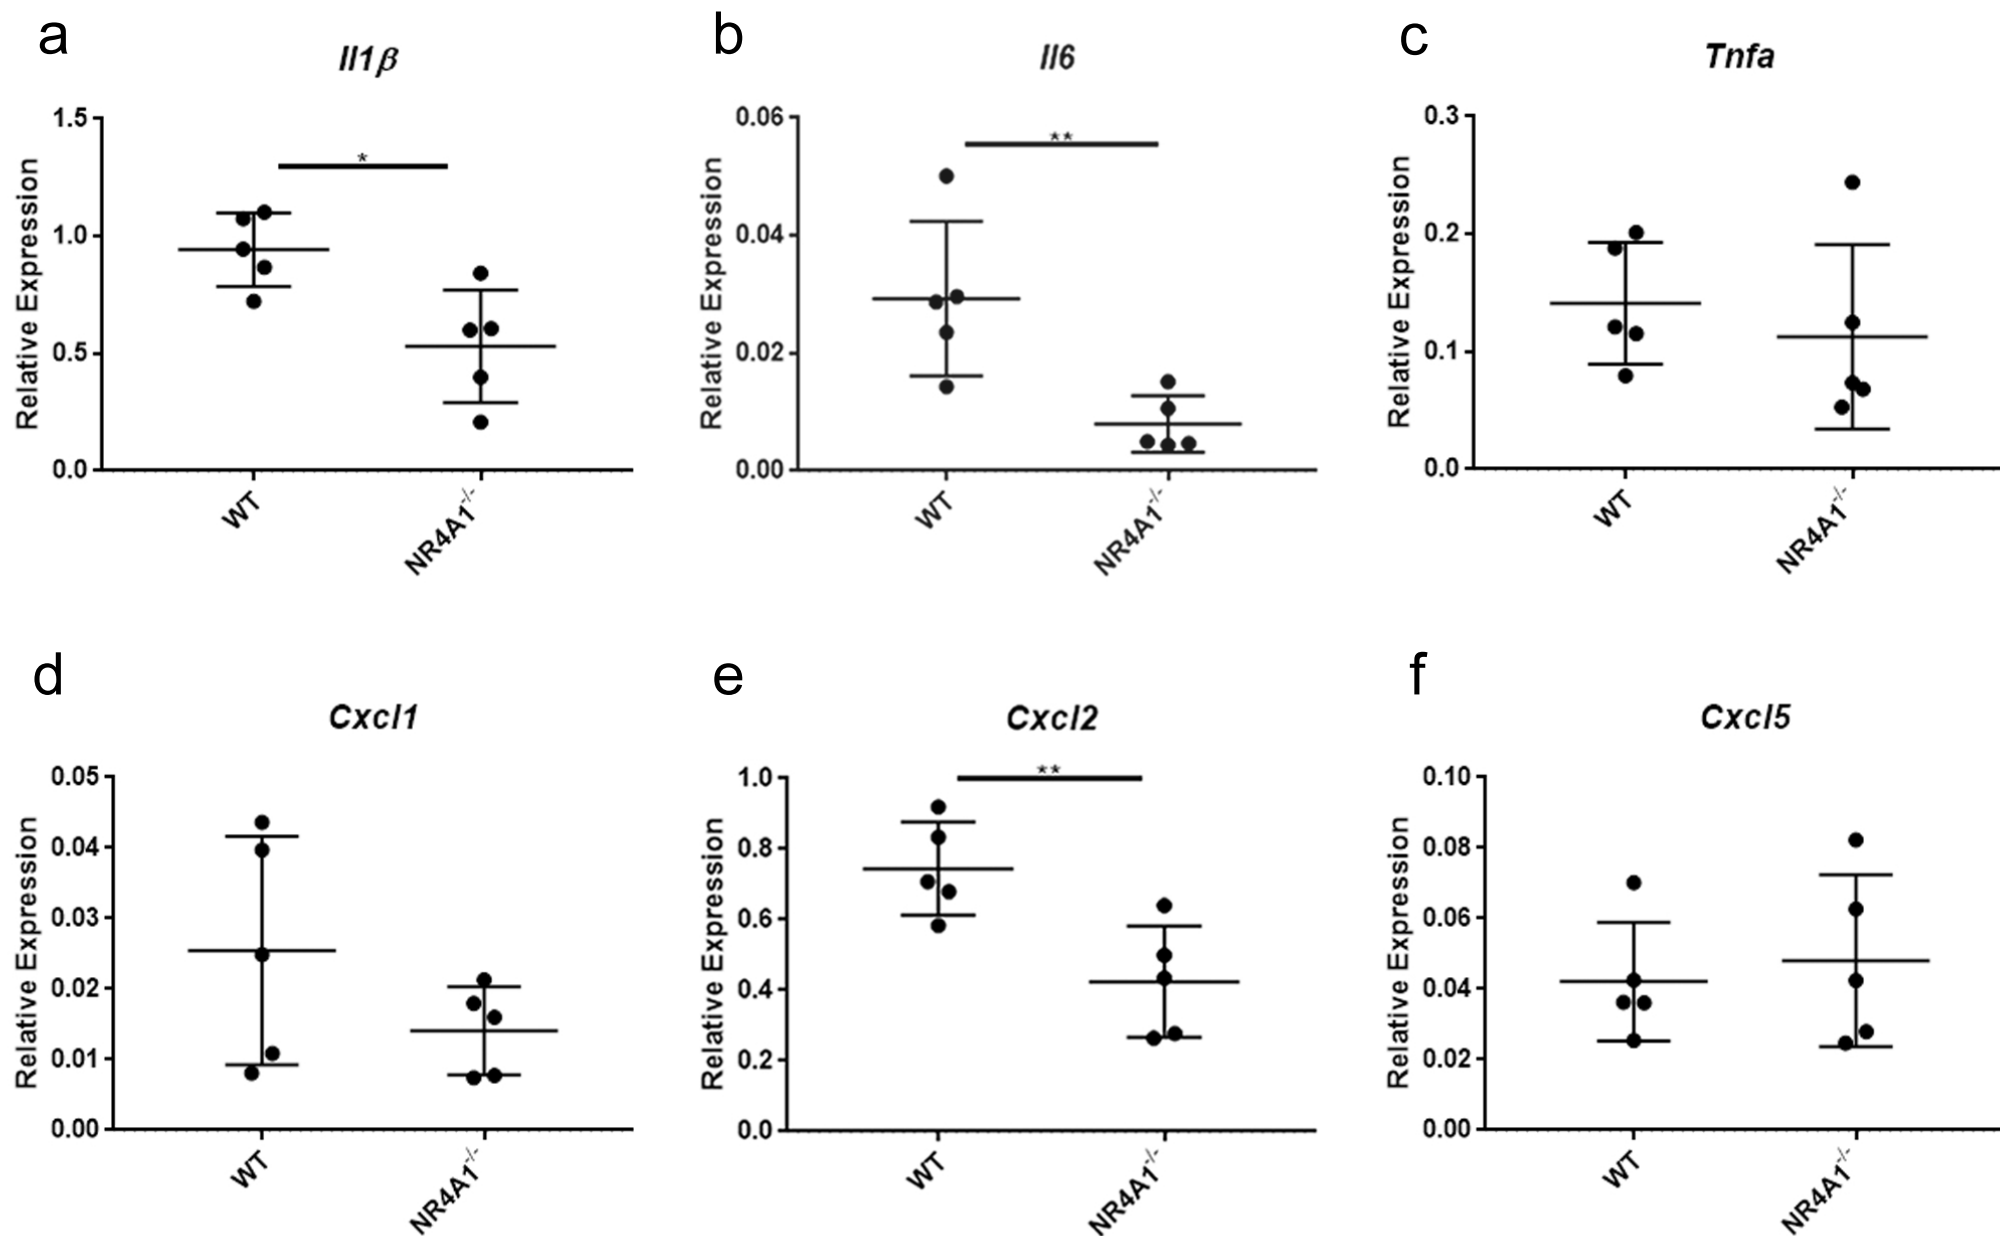

**Figure 2.** *Nr4a1*<sup>-/-</sup> mice have selectively reduced transcription of pro-inflammatory cytokines and chemokines in BAL cells early post-infection. Transcript abundance for pro-inflammatory cytokines (a) *Il1β*, (b) *Il6*, and (c) *Tnfa*, as well as chemokines (d) *Cxcl1*, (e) *Cxcl2*, and (f) *Cxcl5* from the BAL fluid cells of WT (n=5) and *Nr4a1*<sup>-/-</sup> (n=5) mice 5 hours after *K. pneumoniae* infection. These data are representative of two experiments. All gene transcripts were compared to the housekeeper beta-2-microglobulin (*B2M*). Significance was determined by the Student's *t*-test. \**P* < 0.05, \*\**P* < 0.01



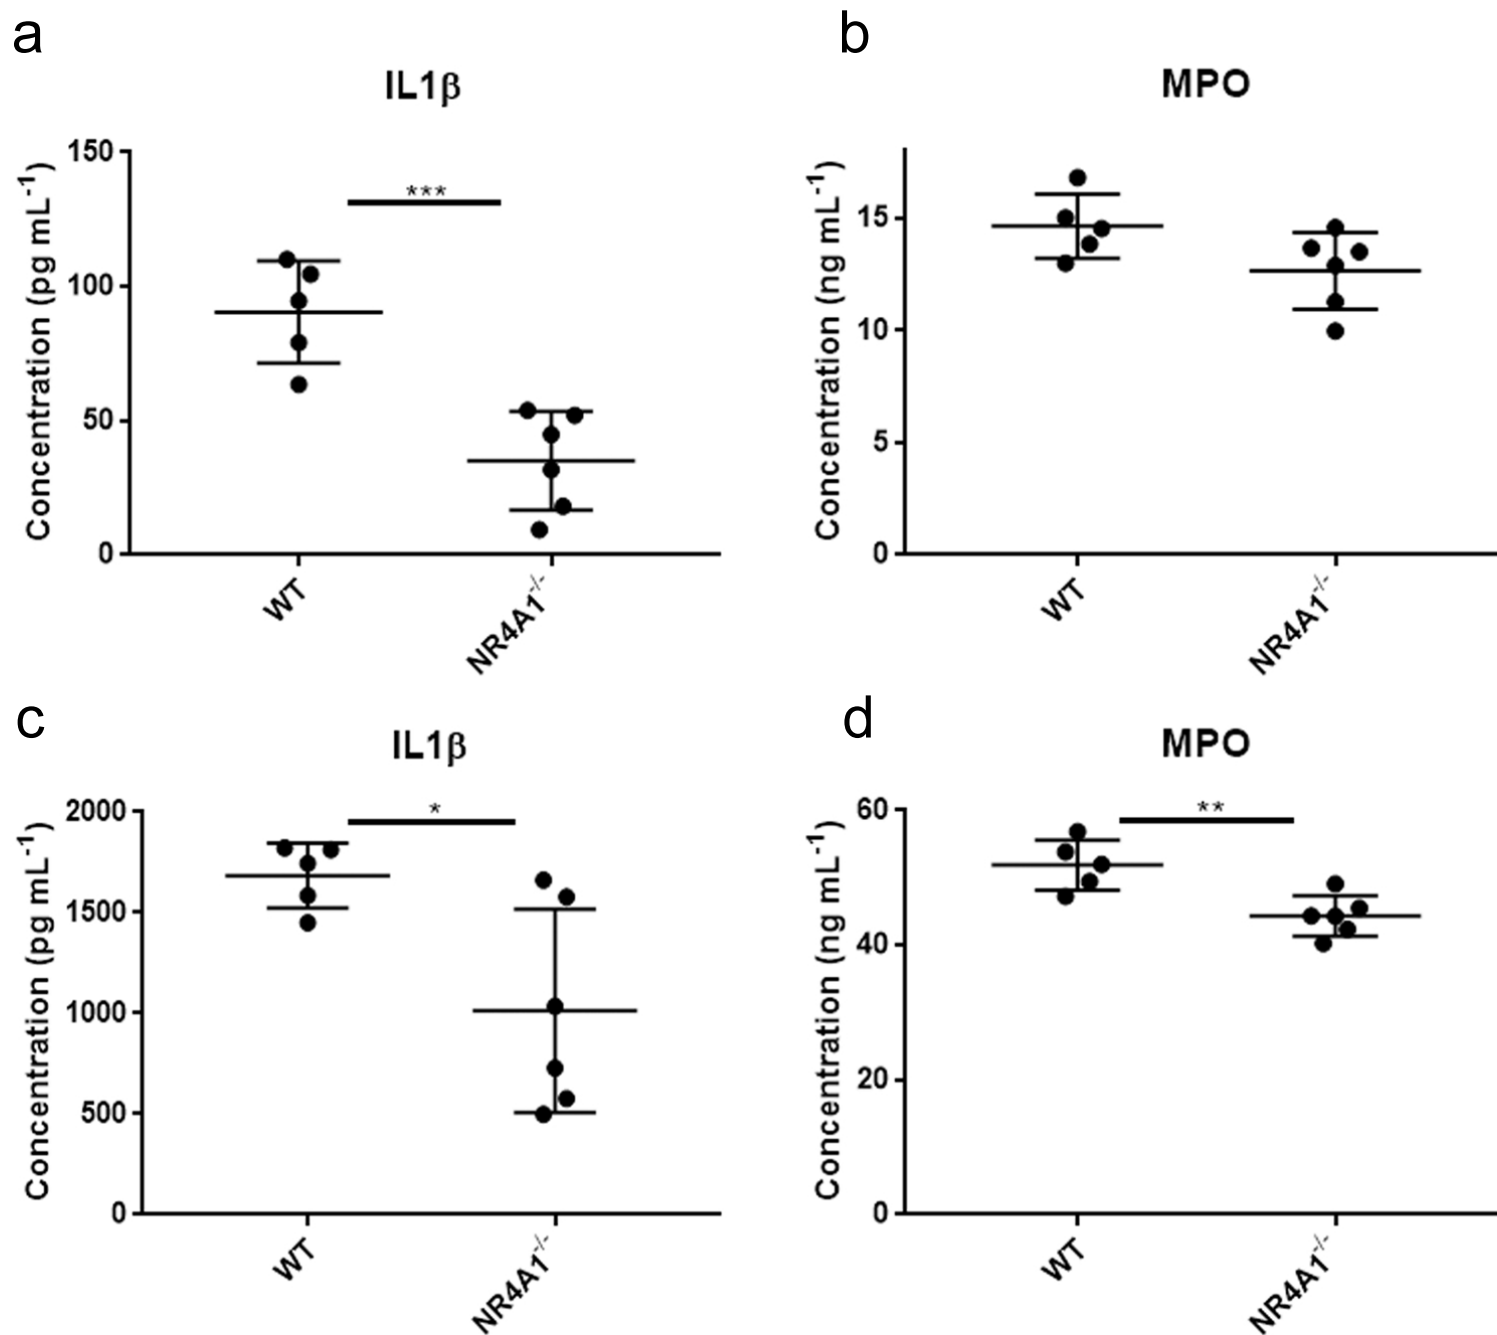

**Figure 3. *Nr4a1*<sup>-/-</sup> mice have reduced IL1 $\beta$  and MPO lung protein after *K. pneumoniae* lung infection**

*Nr4a1*<sup>-/-</sup> mice (n=6) have reduced (a) IL1 $\beta$  5 hours post-infection with *K. pneumoniae* compared to WT controls (n=5), though (b) MPO is not significantly reduced.

By 24 hours post infection, *Nr4a1*<sup>-/-</sup> mice (n=6) have significantly reduced (c) IL1 $\beta$  and (d) MPO protein compared to WT mice controls (n=5).

These data are all representative of two experiments. Significance was determined by the Student's *t*-test. \**P* < 0.05, \*\**P* < 0.01, \*\*\**P* < 0.005

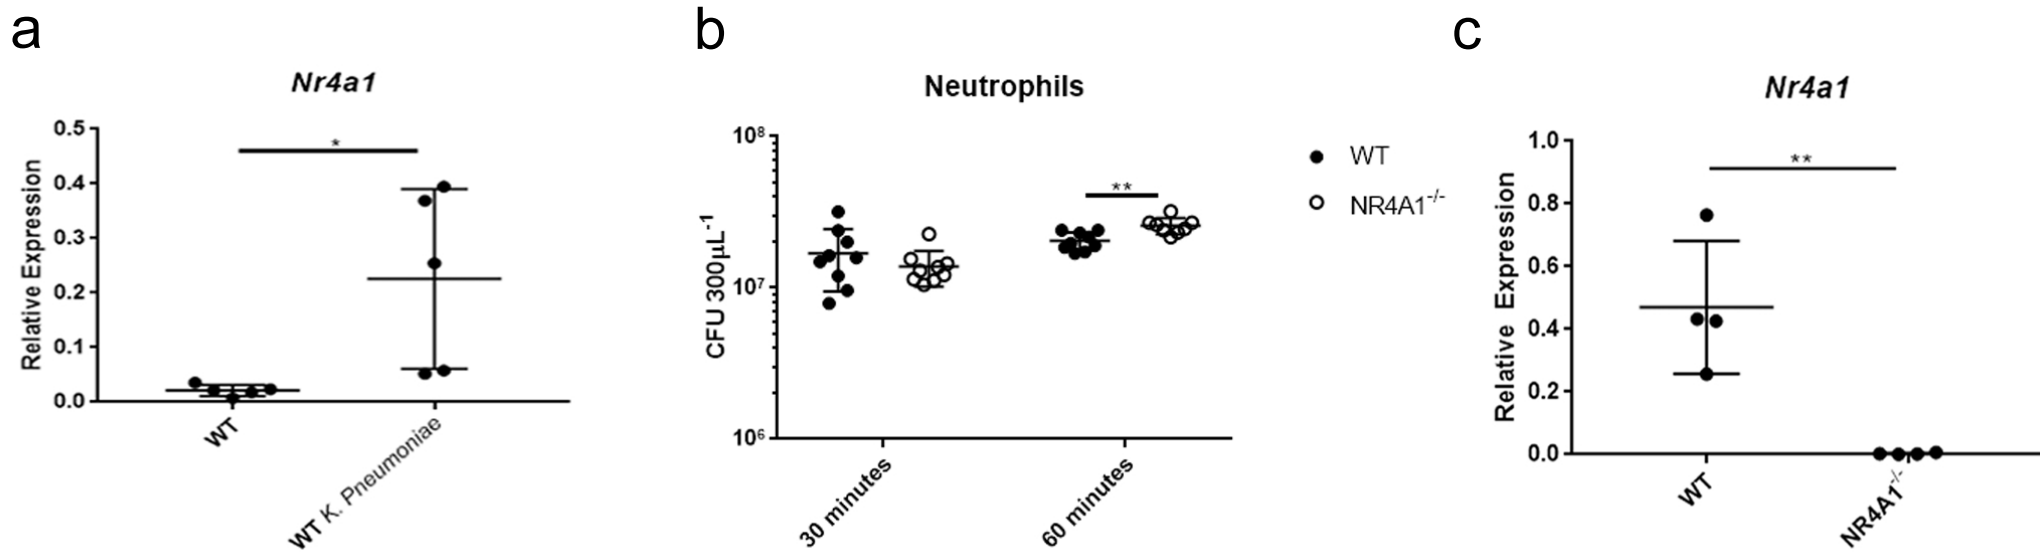

**Figure 4. *Nr4a1* is essential for neutrophil anti-bactericidal function**

(a) *Nr4a1* gene expression of unstimulated (n=5) and *K. pneumoniae* co-cultured (n=5) WT neutrophils. *Nr4a1* gene expression is significantly increased in WT neutrophils co-cultured with *K. pneumoniae*. The (b) *K. pneumoniae* burden from the supernatants of WT (n=9) and *Nr4a1*<sup>-/-</sup> (n=9) neutrophils at 30 minutes and 60 minutes (WT n=9, *Nr4a1*<sup>-/-</sup> n=8) after co-culture with *K. pneumoniae*. (c) *Nr4a1* gene expression of WT (n=5) and *Nr4a1*<sup>-/-</sup> (n=5) neutrophils 60 minutes after *K. pneumoniae* co-culture. WT neutrophils have significantly more *Nr4a1* gene transcript than *Nr4a1*<sup>-/-</sup> neutrophils. All gene transcripts were normalized to *B2M*. The burden results in panel (b) are pooled from two separate experiments and representative of five experiments total. Panels (a) and (c) are representative of three experiments. Significance was determined by the Student's *t*-test. \**P* < 0.05, \*\**P* < 0.01, \*\*\*\**P* < 0.0001

**a**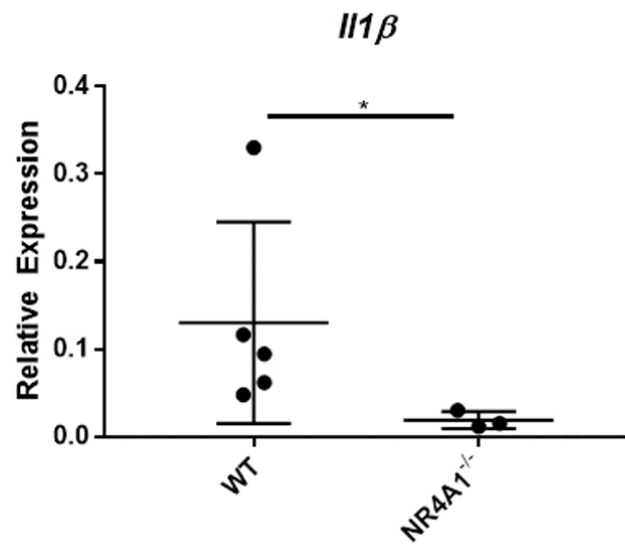**b**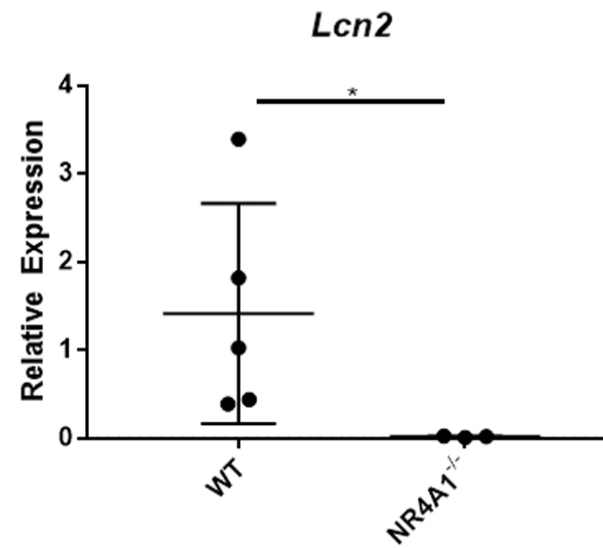**c**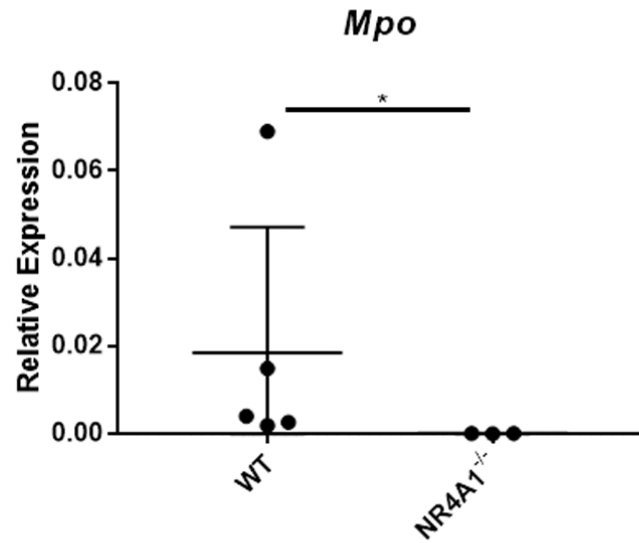**d**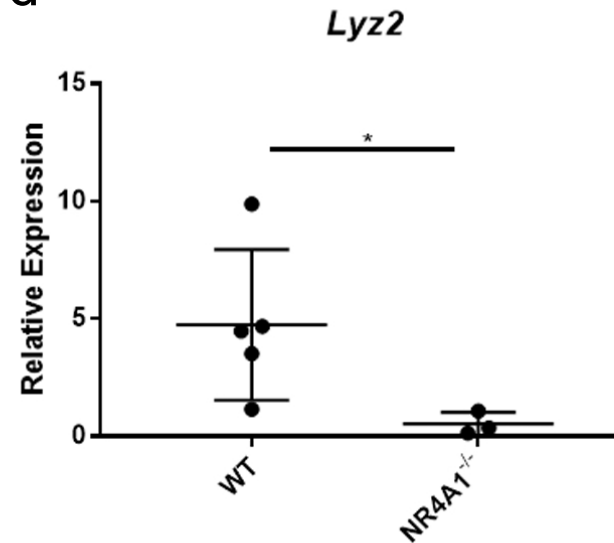

**Figure 5. *Nr4a1*<sup>-/-</sup> neutrophils have decreased inflammatory gene expression following *K. pneumoniae* infection**

*Nr4a1*<sup>-/-</sup> neutrophils (n=3) have decreased genetic expression of (a) *Il1β* and neutrophil-specific genes (b) *Lcn2*, (c) *Mpo*, and (d) *Lyz2* compared to WT controls (n=5). These data are all representative of five experiments. All gene transcripts were normalized to *B2M*. Significance was determined by the Mann-Whitney *U*-test. \**P* < 0.05
